# Supplementary material for: Contribution of the efflux pump AcrAB-TolC to the tolerance of chlorhexidine and other biocides in Klebsiella spp
Source: PubMed Central journal article supplement (PMC9176267; doi:10.1099/jmm.0.001496), 2022-03-24
Supplement: jmm-71-1496-s001.pdf [file jmm-71-1496-s001.pdf]

1 **Supplementary Figures and Tables**

2 **Supplementary Table 1 – Bacterial strains used in this study.** Acquired antibiotic resistance  
 3 markers were generated using RES Finder.

| Strain                             | ST  | Aminoglycoside                                                                                  | Beta-Lactam                                                                                                           | Fluoroquinolone                                                               | Phenicol                                    | Tetracycline |
|------------------------------------|-----|-------------------------------------------------------------------------------------------------|-----------------------------------------------------------------------------------------------------------------------|-------------------------------------------------------------------------------|---------------------------------------------|--------------|
| NCTC 7427                          | 86  |                                                                                                 | <i>blaSHV-1</i>                                                                                                       | <i>oqxAB</i>                                                                  |                                             |              |
| KPUK02                             | 86  |                                                                                                 | <i>blaSHV-28</i>                                                                                                      | <i>oqxAB</i>                                                                  |                                             |              |
| 6                                  | 268 |                                                                                                 | <i>blaSHV-11</i>                                                                                                      | <i>oqxAB</i>                                                                  |                                             |              |
| NCTC 13438                         | 258 | <i>aadA2</i><br><i>aph(3')-Ia</i>                                                               | <i>blaSHV-11</i><br><i>blaKPC-3</i><br><i>blaOXA-9</i>                                                                | <i>oqxAB</i> ,<br><i>gyrA</i> S83I<br><i>parC</i> S80I                        | <i>catA1</i>                                |              |
| 46704                              | 258 | <i>aac(3)-Iva</i><br><i>aph(4)-Ia</i><br><i>aadA1</i><br><i>aph(3')-Ia</i><br><i>aac(6')-Ib</i> | <i>blaSHV-12</i><br><i>blaKPC-2</i><br><i>blaOXA-9</i><br><i>blaTEM-1A</i>                                            | <i>oqxAB</i> ,<br><i>aac(6')Ib-cr</i><br><i>gyrA</i> S83I<br><i>parC</i> S80I |                                             |              |
| CFI_131_KPC-2                      | 258 | <i>aac(6')-Ib</i>                                                                               | <i>blaTEM-1A</i><br><i>blaKPC-2</i><br><i>blaOXA-9</i>                                                                | <i>oqxAB</i> ,<br><i>aac(6')Ib-cr</i><br><i>gyrA</i> S83I<br><i>parC</i> S80I |                                             |              |
| CFI_141_KPC-3                      | 258 | <i>aac(6')-Ib</i><br><i>aadA2</i><br><i>aph(3')-Ia</i>                                          | <i>blaSHV-11</i><br><i>blaKPC-3</i>                                                                                   | <i>oqxAB</i> ,<br><i>aac(6')Ib-cr</i><br><i>gyrA</i> S83I<br><i>parC</i> S80I |                                             |              |
| CFI_147_KPC-2                      | 258 | <i>aph(3'')-Ib</i><br><i>aph(6')-Id</i><br><i>aadA1</i><br><i>aadA2</i><br><i>aph(3')-Ia</i>    | <i>blaCMY-2</i> ,<br><i>blaSHV-12</i><br><i>blaKPC-2</i><br><i>blaOXA-10</i> ,<br><i>blaTEM-1A</i><br><i>blaOXA-9</i> | <i>oqxAB</i><br><i>gyrA</i> S83I<br><i>parC</i> S80I                          | <i>catA1</i><br><i>cmlA1</i><br><i>floR</i> |              |
| MKP103                             | 258 | <i>aadA2</i> ,<br><i>aph(3')-Ia</i><br><i>aac(6')-Ib-cr</i>                                     | <i>blaSHV-11</i><br><i>blaTEM-1A</i><br><i>blaOXA-9</i>                                                               | <i>oqxAB</i><br><i>aac(6')Ib-cr</i><br><i>gyrA</i> S83I<br><i>parC</i> S80I   | <i>catA1</i>                                |              |
| <i>K. oxytoca</i><br>CFI_080_KPC-2 | 2   |                                                                                                 | <i>blaOXY-2-8</i><br><i>blaKPC-2</i><br><i>blaOXA-9</i><br><i>blaTEM-1A</i>                                           | <i>oqxAB</i>                                                                  |                                             |              |

4  
 5  
 6  
 7  
 8  
 9  
 10  
 11

## 12 Supplementary Table 2

| Strain                 | CIP        | CHL   | DOX  | CAZ   |
|------------------------|------------|-------|------|-------|
| M6 (No CHD)            | 0.125-0.25 | 4     | 4-8  | 0.5   |
| M6 (CHD 4 mg/L)        | ≤0.06      | ≤0.5  | ≤0.5 | 0.125 |
| M6 (CHD 8 mg/L)        | ≤0.06      | ≤0.5  | ≤0.5 | 0.125 |
| MGH 78578 (No CHD)     | 2          | 512   | 128  | >64   |
| MGH 78578 (CHD 4 mg/L) | 0.25       | 64    | 16   | >64   |
| MGH 78578 (CHD 8 mg/L) | 0.25       | 32    | 8    | 64    |
| M3 (No CHD)            | 0.125-0.25 | 16-32 | 2    | >64   |
| M3 (CHD 4 mg/L)        | ≤0.06      | ≤0.5  | ≤0.5 | 16    |
| M3 (CHD 8 mg/L)        | ≤0.06      | ≤0.5  | ≤0.5 | 4     |

13

14 **Supplementary Table 2 – MIC values in the presence of sub-lethal levels of chlorhexidine**  
15 **(CHD) for antibiotics known to be subject to efflux by AcrAB-TolC.** All values are given  
16 as mg/L. Antibiotics used include ciprofloxacin (CIP), chloramphenicol (CHL), doxycycline  
17 (DOX) and ceftazidime (CAZ).

18

19

20

21

22

23

24

25

26

27

28

29

30

31

Supplementary Table 3 – MIC values against select biocides for MKP103 transposon mutants

| Strain  | Mutant       | CHD | BAC   | BEC | CPC  | CTAB | DDAB | ALX | DQC   | TRC | ETH  | OCT | CET           | HDPCM | NaDCC    | VRK | PAD  | H <sub>2</sub> O <sub>2</sub> | GLT  |
|---------|--------------|-----|-------|-----|------|------|------|-----|-------|-----|------|-----|---------------|-------|----------|-----|------|-------------------------------|------|
| MKP103  | -            | 64  | 32    | 64  | 8-16 | 64   | 16   | 2-4 | 256   | 2-4 | 6.25 | 4-8 | 0.004 - 0.007 | 16    | 125-250  | 0.5 | 0.04 | 0.005                         | 0.39 |
| KP02744 | <i>ΔacrA</i> | 8   | 16-32 | 64  | 8    | 64   | 8    | 4   | 32    | 1   | 6.25 | 2-4 | 0.002-0.004   | 8     | 125      | 0.5 | 0.04 | 0.005                         | 0.39 |
| KP02740 | <i>ΔacrB</i> | 4-8 | 16-32 | 64  | 8    | 32   | 8    | 4   | 16-32 | 1   | 6.25 | 4   | 0.001-0.004   | 4-8   | 62.5-125 | 0.5 | 0.04 | 0.01                          | 0.39 |
| KP02746 | <i>ΔacrR</i> | 64  | 32    | 64  | 16   | 128  | 16   | 4   | 256   | 2   | 6.25 | 4-8 | 0.015-0.03    | 16    | 250      | 0.5 | 0.04 | 0.005                         | 0.39 |
| KP09901 | <i>ΔenvR</i> | 64  | 32    | 64  | 8-16 | 64   | 8    | 2   | 256   | 4   | 6.25 | 8   | 0.004 - 0.007 | 8     | 250      | 0.5 | 0.04 | 0.01                          | 0.39 |
| KP05254 | <i>ΔmarA</i> | 64  | 32    | 64  | 8-16 | 64   | 16   | 4   | 256   | 4   | 6.25 | 4   | 0.004         | 8     | 250      | 0.5 | 0.04 | 0.01                          | 0.39 |
| KP05377 | <i>ΔmarR</i> | 64  | 32    | 64  | 8-16 | 64   | 16   | 2   | 256   | 4   | 6.25 | 4   | 0.004         | 16    | 250      | 0.5 | 0.04 | 0.005                         | 0.39 |
| KP03202 | <i>ΔramA</i> | 32  | 16    | 64  | 8    | 16   | 8    | 2   | 256   | 2   | 6.25 | 4   | 0.002         | 8     | 125-250  | 0.5 | 0.04 | 0.005                         | 0.39 |
| KP03197 | <i>ΔramR</i> | 64  | 32    | 64  | 8-16 | 256  | 16   | 4   | 256   | 2   | 6.25 | 4   | 0.004-0.007   | 16    | 125-250  | 0.5 | 0.04 | 0.005                         | 0.39 |
| KP01732 | <i>Δrob</i>  | 64  | 32    | 64  | 8-16 | 64   | 8    | 2   | 256   | 4   | 6.25 | 4   | 0.004         | 16    | 125-250  | 0.5 | 0.04 | 0.01                          | 0.39 |
| KP06904 | <i>ΔsdiA</i> | 64  | 32    | 64  | 16   | 64   | 8    | 2   | 256   | 2   | 6.25 | 4   | 0.004 - 0.007 | 16    | 250      | 0.5 | 0.04 | 0.005                         | 0.39 |
| KP00770 | <i>ΔsoxR</i> | 64  | 32    | 64  | 8    | 32   | 16   | 2   | 256   | 4   | 6.25 | 4   | 0.004         | 8     | 125-250  | 0.5 | 0.04 | 0.005                         | 0.39 |

**Supplementary Table 3 – Susceptibility of transposon mutants from *K. pneumoniae* MKP103 to selected biocides.** All values given as mg/L except for ethanol (ETH (%)), cetrимide (CET (%)), Virkon (VRK (%)); peracetic acid (PAD (%)), hydrogen Peroxide (H<sub>2</sub>O<sub>2</sub> (%)) and sodium hypochlorite (NaDCC (ppm)). Other biocides tested included alexidine dihydrochloride (ALX), dequalinium chloride hydrate (DQC), cetylpyridinium chloride (CPC), hexadecylpyridinium chloride monohydrate (HDPCM), chlorhexidine digluconate (CHD), cetyltrimethylammonium bromide (CTAB), didecyldimethylammonium bromide (DDAB), octenidine hydrochloride (OCT), benzalkonium

chloride (BAC), benzethonium chloride (BEC), triclosan (TRC) and glutaraldehyde (GLT). Values highlighted by light grey or dark grey shading indicate a 2-fold or >2-fold change in MIC, respectively, relative to w/t.

Supplementary Table 4 – MIC values against select antibiotics for MKP103 transposon mutants

| Strain  | Mutant               | NOR   | MXF | CIP   | NAL   | LVX | TOB    | GEN  | STP | AZI  | CAZ | CTX   | FOX | TGC   | DOX   |
|---------|----------------------|-------|-----|-------|-------|-----|--------|------|-----|------|-----|-------|-----|-------|-------|
| MKP103  | -                    | >1024 | 512 | >1024 | >1024 | 512 | 128    | 8-16 | 128 | >256 | 2-4 | 4     | >64 | 8     | 64    |
| KP02744 | $\Delta$ <i>acrA</i> | 1024  | 128 | 256   | >1024 | 256 | 128    | 8-16 | 128 | 256  | 0.5 | 0.125 | 16  | 1-2   | 8     |
| KP02740 | $\Delta$ <i>acrB</i> | >1024 | 128 | 512   | >1024 | 128 | 64-128 | 8    | 128 | >256 | 1   | 1-2   | 64  | 0.5-1 | 16    |
| KP02746 | $\Delta$ <i>acrR</i> | >1024 | 512 | >1024 | >1024 | 512 | 128    | 16   | 128 | >256 | 2   | 4     | >64 | 8     | 64    |
| KP09901 | $\Delta$ <i>envR</i> | >1024 | 512 | >1024 | >1024 | 512 | 128    | 8-16 | 128 | >256 | 2   | 2     | >64 | 8     | 64    |
| KP05254 | $\Delta$ <i>marA</i> | >1024 | 512 | >1024 | >1024 | 512 | 128    | 8-16 | 128 | >256 | 2   | 4     | >64 | 8     | 64    |
| KP05377 | $\Delta$ <i>marR</i> | >1024 | 256 | >1024 | >1024 | 512 | 128    | 8-16 | 128 | >256 | 2   | 4     | >64 | 8     | 32-64 |
| KP03202 | $\Delta$ <i>ramA</i> | >1024 | 128 | 512   | >1024 | 256 | 128    | 8-16 | 128 | >256 | 1   | 1     | 64  | 1-2   | 8     |
| KP03197 | $\Delta$ <i>ramR</i> | >1024 | 256 | >1024 | >1024 | 512 | 128    | 8-16 | 128 | >256 | 2   | 4     | >64 | 8     | 64    |
| KP01732 | $\Delta$ <i>rob</i>  | >1024 | 256 | >1024 | >1024 | 512 | 128    | 8-16 | 128 | >256 | 2   | 4     | >64 | 8-16  | 32    |

**Supplementary Table 4 – Susceptibility of transposon mutants from *K. pneumoniae* MKP103 to selected antibiotics.** MIC values are given as mg/L for the antibiotics norfloxacin (NOR), moxifloxacin (MXF), ciprofloxacin (CIP), naladixic acid (NAL), levofloxacin (LVX), tobramycin (TOB), gentamicin (GEN), streptomycin (STP), azithromycin (AZI), ceftazidime (CAZ), cefotaxime (CTX), cefoxatin (FOX), tigecycline (TGC) and doxycycline (DOX). Values highlighted by light grey or dark grey shading indicate a 2-fold or >2-fold change in MIC respectively, relative to w/t.

**Supplementary Table 5 – Mutations observed after adaptation to chlorhexidine**

| CHD adapted strain        | Mutation                                     | MGH 78578 equivalent | Function                               |
|---------------------------|----------------------------------------------|----------------------|----------------------------------------|
| MKP103                    | SmvR Q105STOP                                | KPN_01878            | Regulator of MFS pump SmvA             |
|                           | BamA L377Q                                   | KPN_00190            | Outer membrane protein assembly factor |
| KP03197 ( $\Delta ramR$ ) | <i>smvR</i> duplication of nucleotides 52-58 | KPN_01878            | Regulator of MFS pump SmvA             |
|                           | RcnA E87D                                    | KPN_00423            | Efflux system for nickel and cobalt    |
| KP03202 ( $\Delta ramA$ ) | <i>smvR</i> deletion of nucleotides 52-58    | KPN_01878            | Regulator of MFS pump SmvA             |
|                           | in promoter of hypothetical protein          | -                    | -                                      |
| KP05925 ( $\Delta smvA$ ) | <i>sspA</i> deletion nucleotide 246          | KPN_03628            | Stringent starvation protein A         |
|                           | <i>mipA</i> deletion nucleotide 471          | KPN_01194            | MltA-interacting protein               |

**Supplementary Table 6 – Change in MIC of biocides after adaptation to chlorhexidine.** All values given in mg/L except for cetrимide (CET (%)). Other biocides tested included cetylpyridinium chloride (CPC), hexadecylpyridinium chloride monohydrate (HDPCM), chlorhexidine digluconate (CHD), cetyltrimethylammonium bromide (CTAB), octenidine hydrochloride (OCT), benzalkonium chloride (BAC) and triclosan (TRC). Fold change against pre-adapted strain is indicated in brackets. For efflux pump status, ↑ indicates upregulated, ↓ indicates downregulated and b indicates basal level.

|                         | CHD         | CTAB         | CPC         | HDPCM    | TRC        | BAC      | OCT     | CET             | Efflux Pump Status           |
|-------------------------|-------------|--------------|-------------|----------|------------|----------|---------|-----------------|------------------------------|
| MKP103                  | 64-128      | 32           | 16-32       | 8-16     | 8          | 16       | 4       | 0.0015-0.003    | ↑ <i>acrAB</i> b <i>smvA</i> |
| MKP103 CHD              | 512 (4-8)   | 64-128 (2-4) | 32-64 (1-2) | 64 (4-8) | 8 (1)      | 16 (1)   | 4 (1)   | 0.007 (2-4)     | ↑ <i>acrAB</i> ↑ <i>smvA</i> |
| MKP103Δ <i>ramA</i>     | 32-64       | 16           | 8           | 8        | 4          | 8-16     | 2-4     | 0.0007-0.0015   | ↓ <i>acrAB</i> b <i>smvA</i> |
| MKP103Δ <i>ramA</i> CHD | 128-256 (4) | 16-32 (1-2)  | 8-16 (1-2)  | 16 (2)   | 4 (1)      | 8 (1)    | 2-4 (1) | 0.0015 (1)      | ↓ <i>acrAB</i> ↑ <i>smvA</i> |
| MKP103Δ <i>ramR</i>     | 64-128      | 32           | 16          | 8-16     | 8          | 8-16     | 4       | 0.0015-0.003    | ↑ <i>acrAB</i> b <i>smvA</i> |
| MKP103Δ <i>ramR</i> CHD | 256-512 (4) | 64 (2)       | 32-64 (2-4) | 32 (2-4) | 8 (1)      | 8-16 (1) | 4 (1)   | 0.007-0.015 (4) | ↑ <i>acrAB</i> ↑ <i>smvA</i> |
| MKP103Δ <i>smvA</i>     | 16-32       | 16-32        | 8           | 8        | 8          | 16       | 2-4     | 0.0015          | ↑ <i>acrAB</i> ↓ <i>smvA</i> |
| MKP103Δ <i>smvA</i> CHD | 64-128 (4)  | 16(1)        | 8 (1)       | 8 (1)    | 8-16 (1-2) | 8-16 (1) | 2-4 (1) | 0.0015 (1)      | ↑ <i>acrAB</i> ↓ <i>smvA</i> |

### Supplementary Figure S1

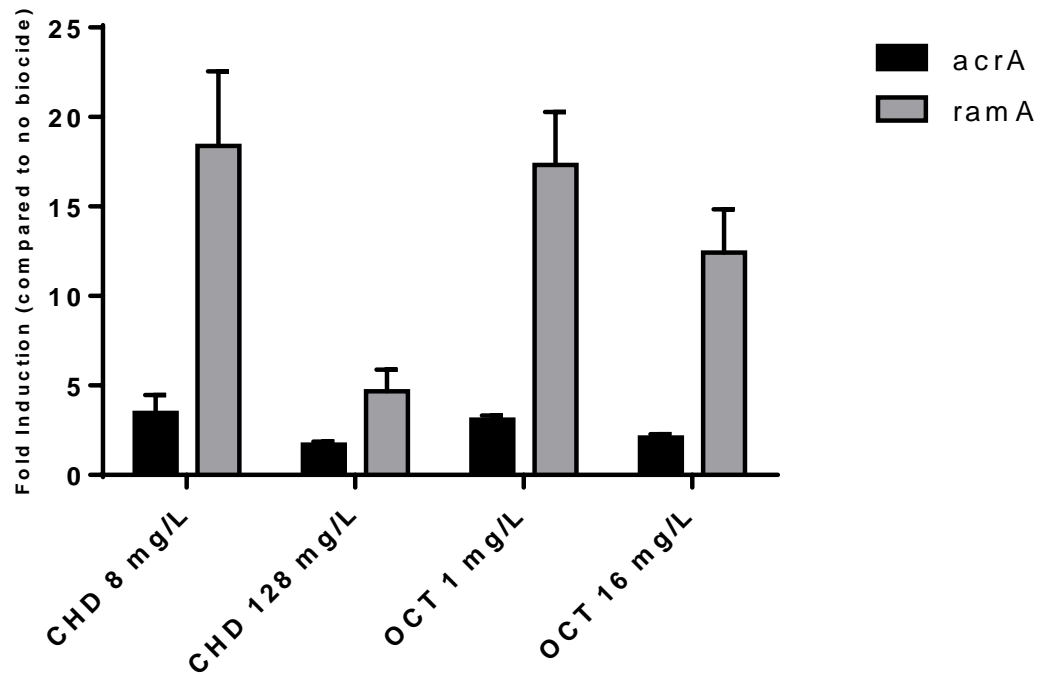

Figure S1 – Upregulation of *acrA* and *ramA* following challenge with chlorhexidine (CHD) or octenidine (OCT). Results are in triplicate and values are represented as the mean fold change, error bars are the SEM.
